# Supplementary material
Source: publisher site journal article supplement (https://www.dovepress.com/article/365549)
Supplement: Supplementary file 1 [file get_supplementary_file.php]

**Supplementary Materials**

###### **Annex I:** Histopathological Procedures (Takulder, 2007)

- **Fixation** of tissue by 10% neutral buffered formaldehyde
- Trimming part of the tissue in a way that the lesion we require be included or not missed and to fit standard histological processing tissue cassettes (5mm thickness).
- Tissue specimen processing: fixation of tissue by formalin, dehydrating tissue by increasing alcohols concentration, clearing of tissue by xylene, and impregnation of tissue by paraffin wax. Formalin-I 2hr - ---Formalin-II 2hr - --70% Alcohol 1hr --- 95% Alcohol- 100% Alcohol-I1hr--- 100% Alcohol-II 2hrs ----- 100% Alcohol-III 2hrs ----- Xylene-I 1:30hrs ------- Xylene-II 1:30hrs ------ Xylene-III 1:30hrs ------ Paraffin-I 2hrs --- Paraffin-II 3hrs.
- **Embedding of processed tissue**: impregnated tissue is placed in a mould with their labels and then fresh melted wax (54-600c) is poured and allowed to settle and solidify.
- **Sectioning**: sectioning of tissue in 3-5 micron thickness and put on water bath to straighten the ribbon, and then adhere on the surface of frost ended and clear slide. Later label and put an incubator overnight.
- **Staining**: Hematoxyline eosine staining procedure
- Deparaffinize slides in two changes of xylene for 5minutes
- Hydrate slides in three changes of 100% alcohol each for 3minutes and 1 changes of 95% alcohol for a minute and one change of 70% alcohol for 3minutes
- Rinse in distilled water until repples disappear from slides.
- Place in heamatoxyline (mayer’s hematoxline) for 10-15 minutes
- Rinse in tape water until water runs clear
- Decolorize in 1% acid alcohol (Eosin), 3 qiuck dips. Check differentiation microscopically: Nucleic should be distinct; cytoplasm should be uncolored.
- Rinse in tap water until ripples disappear from slides. Stain in eosin, 3 dips.
- Dehydrate in 70% 3 dips, 95% alcohol of 3dips and 100% alcohol, 3 changes each 3minutes.
- Clear in 3 changes of xylene for 5 minutes each. Mount cover glass with DPX.
- Examination of the prepared slides under the microscope

###### **Annex II**: Coprological Methods

**Procedure of Floatation method:**

- Place about 2gram of the fecal sample in a suitable container such as cup.
- Add 30ml of floatation fluid and make an emulsion by mixing the fluid with the feces
- It was strained through a metal tea strainer into second cup
- The floatation fluid is added in to the test tube until a meniscus is formed
- Placed a glass coverslip over the meniscus and allowed to remain for 10-15 minutes
- Then coverslip is removed and placed on slide and examine under the microscope.

**Procedure of Sedimentation Techniques**:

- Mix two gram of fecal with tap water in a cup
- The mixture is strained by a tea strainer into a centrifuge tube.
- The sample is centrifuged at about 1500 cycle/ minute (rpm)
- Pour off the solution in the top of the tube without disturbed the sediment at the bottom.
- Transfer a small amount of the top layer of the sediment to a slide with pipette and bulb
- The cover slip is placed to the drop and examine under the microscope

**Procedures of Baermann Techniques**:

- Prepared and spread a piece of gauze and place 5gram of fecal on the gauze
- Then after covered by the warm water
- Allow the feces on the apparatus to remain undistributed overnight
- Placed the petridish under the rubber tube, and open the plug to allow a large drop of fluid to fall on the slide
- A coverslip is applied to the slide and examined microscopically for the presence of larvae

###### **Annex III:** Recording Sheets of lesions, recovered worms, hematological and serum biochemical data during research

Recording Sheets of lesions and recovered adult worms

| No | Spp code | Spp of animals | Worm count | Site of infection | Gross lesion | Tissue sample |
| --- | --- | --- | --- | --- | --- | --- |
|  |  |  |  |  |  |  |
|  |  |  |  |  |  |  |
|  |  |  |  |  |  |  |
|  |  |  |  |  |  |  |
|  |  |  |  |  |  |  |
|  |  |  |  |  |  |  |
|  |  |  |  |  |  |  |
|  |  |  |  |  |  |  |
|  |  |  |  |  |  |  |
|  |  |  |  |  |  |  |
|  |  |  |  |  |  |  |
|  |  |  |  |  |  |  |

Hematological parameters of infected and uninfected control sheep and goat

| Animal code | PCV(%) | Hb(g/dl) | RBCx106 | WBCx103 | Blood indices | | | Differential WBC Count | | | | |
| --- | --- | --- | --- | --- | --- | --- | --- | --- | --- | --- | --- | --- |
|  |  |  |  |  | MCV(fl) | MCH(pg) | MCHC(g/dl) | N% | E% | B% | M% | L% |
|  |  |  |  |  |  |  |  |  |  |  |  |  |
|  |  |  |  |  |  |  |  |  |  |  |  |  |
|  |  |  |  |  |  |  |  |  |  |  |  |  |
|  |  |  |  |  |  |  |  |  |  |  |  |  |
|  |  |  |  |  |  |  |  |  |  |  |  |  |
|  |  |  |  |  |  |  |  |  |  |  |  |  |
|  |  |  |  |  |  |  |  |  |  |  |  |  |
|  |  |  |  |  |  |  |  |  |  |  |  |  |
|  |  |  |  |  |  |  |  |  |  |  |  |  |
|  |  |  |  |  |  |  |  |  |  |  |  |  |
|  |  |  |  |  |  |  |  |  |  |  |  |  |
|  |  |  |  |  |  |  |  |  |  |  |  |  |
|  |  |  |  |  |  |  |  |  |  |  |  |  |
